# Supplementary material
Source: PubMed Central journal article supplement (PMC4580276)
Supplement: NIHMS720259-supplement-1-10.pdf [file NIHMS720259-supplement-1-10.pdf]

Appendix 1: Trends in asthma hospitalizations with invasive mechanical ventilation - changes in age structure.

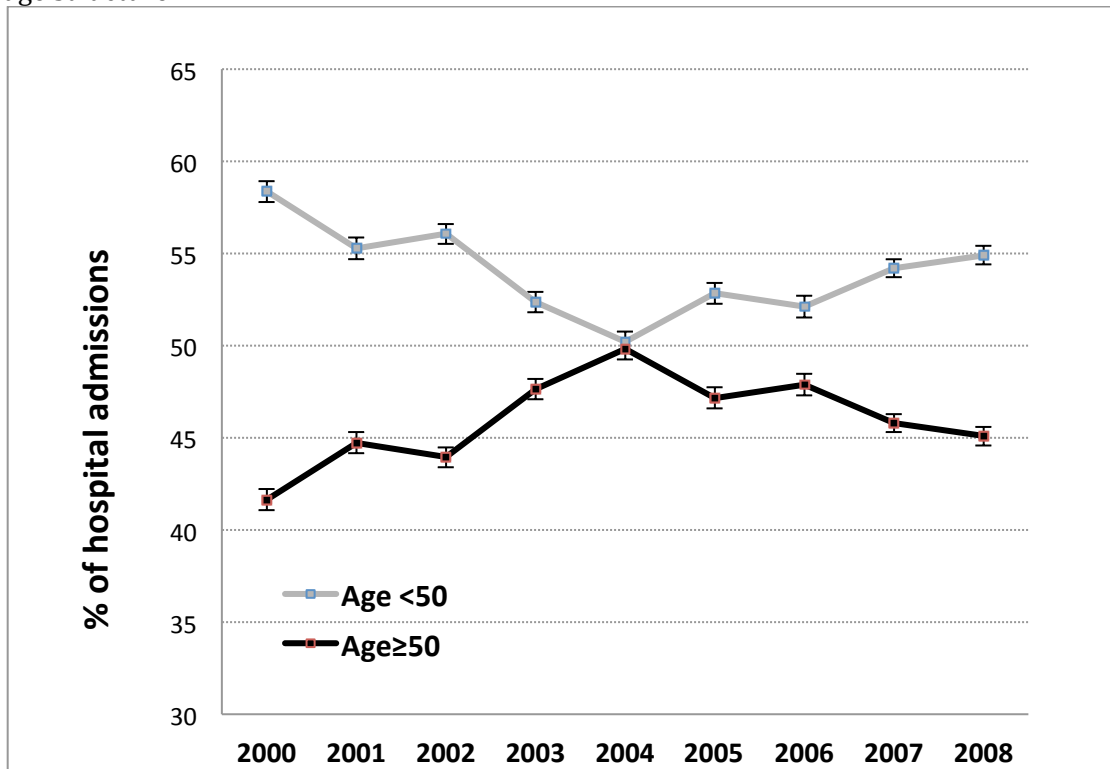

Appendix 2: Trends in asthma hospitalizations - changes in age structure.

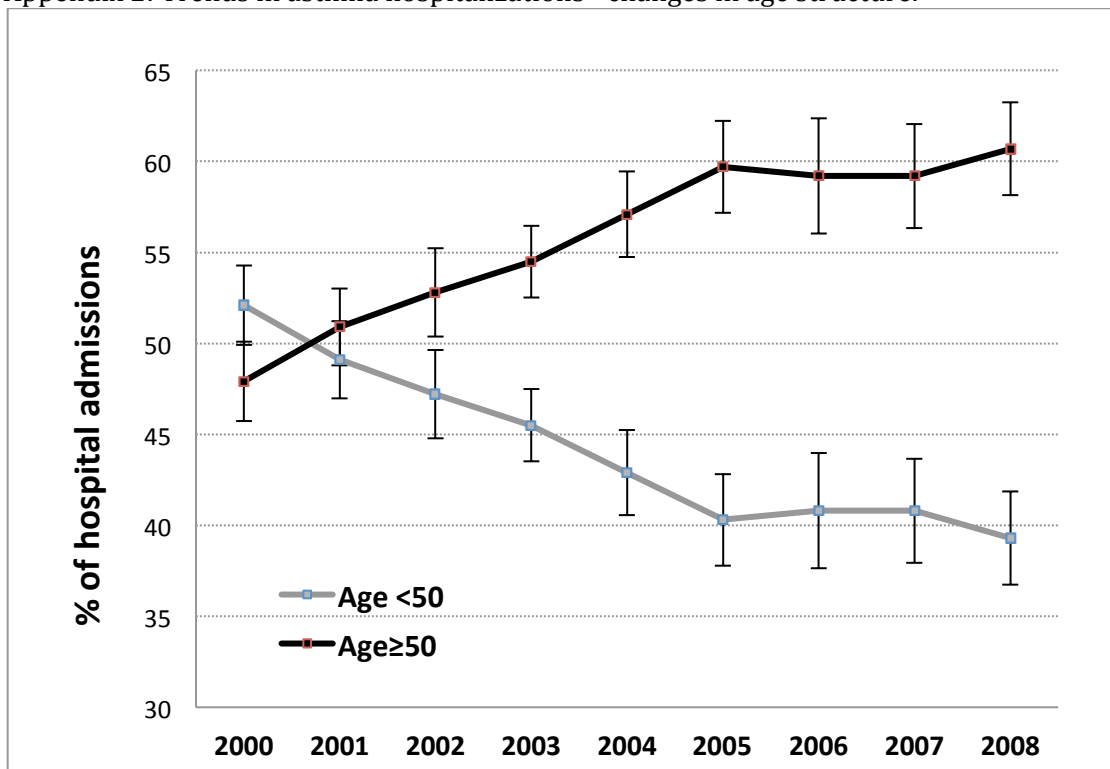

Appendix 3: Predictors of any mechanical ventilation in asthma using multivariate logistic model.

| Predictors                             | Odds ratio (95% Confidence Interval) |
|----------------------------------------|--------------------------------------|
| Age category                           |                                      |
| 18-34                                  | Reference                            |
| 35-49*                                 | 1.03(0.66-1.61)                      |
| 50-64*                                 | 1.18(0.75-1.85)                      |
| 65-79                                  | 1.03(0.57-1.86)                      |
| 80 or more                             | 1.08(0.53-2.20)                      |
| Gender (%)                             |                                      |
| Male                                   | Reference                            |
| Female*                                | 0.84(0.62-1.14)                      |
| Race(%)                                |                                      |
| White                                  | Reference                            |
| African American*                      | 1.57(1.11-2.22)                      |
| Hispanic                               | 0.95(0.57-1.57)                      |
| Asian*                                 | 2.78(1.32-5.81)                      |
| Others*                                | 2.41(1.31-4.43)                      |
| Unknown*                               | 0.37(0.21-0.63)                      |
| Primary Payer (%)                      |                                      |
| Medicare                               | Reference                            |
| Medicaid                               | 1.37(0.88-2.15)                      |
| Private*                               | 0.88(0.55-1.38)                      |
| Self*                                  | 1.71(1.00-2.93)                      |
| Other*                                 | 0.65(0.25-1.69)                      |
| Chalrson-Deyo's co-morbidity index (%) |                                      |
| 1-2                                    | Reference                            |
| 3-4                                    | 1.19(0.71-2.00)                      |
| 5-6                                    | 2.10(0.66-6.68)                      |
| 7 or more                              | 0.99(0.36-2.71)                      |
| Hospital Characteristics (%)           |                                      |
| Non teaching hospital                  | Reference                            |
| Teaching hospital*                     | 2.30(1.70-3.10)                      |
| Obstructive sleep apnea*               | 2.11(1.39-3.18)                      |
| Year                                   |                                      |
| 2000                                   | Reference                            |
| 2001                                   | 0.71(0.27-1.88)                      |
| 2002*                                  | 2.22(1.06-4.65)                      |
| 2003*                                  | 1.85(0.88-3.85)                      |
| 2004*                                  | 2.19(1.05-4.55)                      |
| 2005*                                  | 1.35(0.61-2.99)                      |
| 2006*                                  | 2.46(1.21-5.02)                      |
| 2007*                                  | 2.11(1.01-4.40)                      |
| 2008*                                  | 2.43(1.19-4.94)                      |

\* Significant at p<0.05

Appendix 4: Predictors of invasive mechanical ventilation in asthma using multivariate logistic model.

| Predictors                                    | Odds ratio (95% Confidence Interval) |
|-----------------------------------------------|--------------------------------------|
| <b>Age category</b>                           |                                      |
| 18-34                                         | Reference                            |
| 35-49*                                        | 0.76(0.70-0.82)                      |
| 50-64*                                        | 0.72(0.65-0.78)                      |
| 65-79*                                        | 0.64(0.57-0.72)                      |
| 80 or more*                                   | 0.55(0.46-0.63)                      |
| <b>Gender (%)</b>                             |                                      |
| Male                                          | Reference                            |
| Female*                                       | 0.71(0.67-0.75)                      |
| <b>Race(%)</b>                                |                                      |
| White                                         | Reference                            |
| African American*                             | 1.37(1.27-1.48)                      |
| Hispanic                                      | 1.01(0.92-1.12)                      |
| Asian*                                        | 2.78(2.39-3.25)                      |
| Others*                                       | 1.68(1.11-2.52)                      |
| Unknown*                                      | 0.49(0.45-0.54)                      |
| <b>Primary Payer (%)</b>                      |                                      |
| Medicare                                      | Reference                            |
| Medicaid*                                     | 1.23(1.11-1.36)                      |
| Private*                                      | 1.11(1.01-1.22)                      |
| Self*                                         | 1.55(1.38-1.74)                      |
| Other*                                        | 1.26(1.08-1.47)                      |
| <b>Chalrson-Deyo's co-morbidity index (%)</b> |                                      |
| 1-2                                           | Reference                            |
| 3-4                                           | 1.14(1.00-1.29)                      |
| 5-6                                           | 1.37(0.92-2.05)                      |
| 7 or more                                     | 0.74(0.57-0.96)                      |
| <b>Hospital Characteristics (%)</b>           |                                      |
| Non teaching hospital                         | Reference                            |
| Teaching hospital*                            | 1.62(0.52-1.72)                      |
| <b>Year</b>                                   |                                      |
| 2000                                          | Reference                            |
| 2001                                          | 1.02(0.91-1.14)                      |
| 2002                                          | 0.96(0.86-1.08)                      |
| 2003*                                         | 0.88(0.78-0.97)                      |
| 2004*                                         | 0.75(0.67-0.84)                      |
| 2005*                                         | 0.61(0.53-0.69)                      |
| 2006*                                         | 0.50(0.44-0.57)                      |
| 2007*                                         | 0.53(0.47-0.61)                      |
| 2008*                                         | 0.52(0.46-0.59)                      |

\* Significant at p<0.05

Appendix 5: Predictors of NIV in asthma using multivariate logistic model.

| Predictors                             | Odds ratio (95% Confidence Interval) |
|----------------------------------------|--------------------------------------|
| Age category                           |                                      |
| 18-34                                  | Reference                            |
| 35-49*                                 | 1.20 (1.08-1.32)                     |
| 50-64*                                 | 1.26 (1.13-1.39)                     |
| 65-79                                  | 1.03 (0.91-1.17)                     |
| 80 or more                             | 0.99 (0.85-1.16)                     |
| Gender (%)                             |                                      |
| Male                                   | Reference                            |
| Female*                                | 0.74 (0.70-0.79)                     |
| Race(%)                                |                                      |
| White                                  | Reference                            |
| African American*                      | 1.30 (1.22-1.40)                     |
| Hispanic                               | 1.08 (0.99-1.19)                     |
| Asian*                                 | 2.08 (1.75-2.48)                     |
| Others*                                | 1.30 (1.09-1.54)                     |
| Unknown*                               | 0.31 (0.28-0.34)                     |
| Primary Payer (%)                      |                                      |
| Medicare                               | Reference                            |
| Medicaid                               | 1.00 (0.92-1.09)                     |
| Private*                               | 0.74 (0.68-0.80)                     |
| Self*                                  | 0.82 (0.72-0.93)                     |
| Other*                                 | 0.82 (0.70-0.97)                     |
| Chalrson-Deyo's co-morbidity index (%) |                                      |
| 1-2                                    | Reference                            |
| 3-4                                    | 1.07 (0.97-1.18)                     |
| 5-6                                    | 1.20 (0.92-1.56)                     |
| 7 or more                              | 0.77 (0.60-1.00)                     |
| Hospital Characteristics (%)           |                                      |
| Non teaching hospital                  | Reference                            |
| Teaching hospital*                     | 1.64 (1.54-1.73)                     |
| Obstructive sleep apnea*               | 8.50 (7.99-9.03)                     |
| Year                                   |                                      |
| 2000                                   | Reference                            |
| 2001                                   | 1.10 (0.89-1.35)                     |
| 2002*                                  | 1.50 (1.23-1.82)                     |
| 2003*                                  | 1.84 (1.54-2.21)                     |
| 2004*                                  | 2.73 (2.30-3.25)                     |
| 2005*                                  | 2.14 (1.79-2.55)                     |
| 2006*                                  | 3.36 (2.84-3.97)                     |
| 2007*                                  | 3.52 (2.98-4.17)                     |
| 2008*                                  | 3.47 (2.94-4.10)                     |

\* Significant at p<0.05

Appendix 6: Demographic and clinical characteristics of patients discharged with AAE - 2000 to 2008.

| Patient characteristics                            | 2000          | 2001          | 2002          | 2003          | 2004          | 2005        | 2006          | 2007          | 2008          |
|----------------------------------------------------|---------------|---------------|---------------|---------------|---------------|-------------|---------------|---------------|---------------|
| Total                                              | 226,385       | 230,991       | 244,388       | 284,828       | 252,639       | 270,719     | 266,551       | 253,398       | 262,190       |
| Age in years, mean ± SD                            | 50.6±<br>18.1 | 52.0±<br>18.3 | 52.6±<br>18.1 | 53.0±<br>18.1 | 54.2±<br>17.9 | 55.1±<br>18 | 54.7±<br>17.8 | 54.5±<br>17.6 | 55.2±<br>17.8 |
| Gender (%)                                         |               |               |               |               |               |             |               |               |               |
| Female*                                            | 73.8          | 74            | 73.1          | 72.6          | 72.9          | 73.1        | 72.4          | 71.9          | 72.4          |
| Race(%)                                            |               |               |               |               |               |             |               |               |               |
| White                                              | 43.8          | 42.2          | 40.5          | 40.2          | 40.7          | 45.2        | 40.7          | 40.6          | 46.9          |
| African American                                   | 18.4          | 17.8          | 18.6          | 18.7          | 19.9          | 15.1        | 19.5          | 19.8          | 19.9          |
| Hispanic                                           | 9.5           | 9.8           | 8.3           | 10.9          | 9.0           | 8.4         | 11.3          | 9.5           | 10            |
| Asian or Pacific Islander                          | 1.6           | 1.8           | 1.5           | 1.6           | 1.5           | 1.2         | 1.6           | 1.4           | 1.5           |
| Other                                              | 2.7           | 1.5           | 2.7           | 3.1           | 1.9           | 2.6         | 1.8           | 2.1           | 3.0           |
| Unknown*                                           | 23.9          | 26.8          | 28.2          | 25.4          | 26.7          | 27.3        | 24.6          | 26            | 18.6          |
| Payer (%)                                          |               |               |               |               |               |             |               |               |               |
| Medicare*                                          | 30.5          | 33.2          | 34.9          | 36.6          | 38.3          | 40.8        | 40.2          | 39.1          | 40            |
| Medicaid                                           | 20.2          | 20.3          | 19.5          | 21.3          | 19.7          | 18.4        | 20.5          | 18.9          | 19.2          |
| Private*                                           | 36.9          | 34.8          | 33.5          | 30.6          | 29.2          | 28.7        | 27            | 27.9          | 28.3          |
| Self                                               | 8.3           | 8.5           | 8.4           | 8.0           | 9.2           | 8.3         | 8.3           | 9.6           | 8.4           |
| Other                                              | 4.2           | 3.3           | 3.7           | 3.6           | 3.6           | 3.7         | 4.1           | 4.5           | 4.2           |
| Charlson-Deyo's co-morbidity index* (%)            |               |               |               |               |               |             |               |               |               |
| 1-2*                                               | 94.9          | 94.4          | 94.2          | 93.5          | 92.7          | 91.7        | 89.6          | 87.9          | 86.2          |
| 3-4*                                               | 3.8           | 4.2           | 4.5           | 5.1           | 5.7           | 6.7         | 8.1           | 9.2           | 10.6          |
| 5-6*                                               | 0.1           | 0.1           | 0.1           | 0.2           | 0.2           | 0.4         | 0.8           | 1.3           | 1.7           |
| 7 or more                                          | 1.2           | 1.3           | 1.2           | 1.2           | 1.4           | 1.3         | 1.5           | 1.6           | 1.5           |
| Co-morbidities (%)                                 |               |               |               |               |               |             |               |               |               |
| Diabetes mellitus*                                 | 16.5          | 18.5          | 19.7          | 21.8          | 22.7          | 24.8        | 25.7          | 26.3          | 26.7          |
| Congestive heart failure*                          | 6.7           | 7.9           | 8.7           | 9.7           | 11.2          | 11.5        | 12            | 11.7          | 11.9          |
| Morbid obesity*                                    | 3.2           | 2.9           | 4.0           | 4.9           | 5.6           | 6.4         | 6.8           | 7.9           | 9.4           |
| Cancer*                                            | 4.0           | 4.3           | 4.9           | 4.8           | 5.3           | 5.6         | 5.6           | 5.8           | 6.2           |
| Alcoholism*                                        | 1.6           | 1.6           | 1.7           | 1.6           | 1.8           | 1.8         | 2.2           | 2.2           | 2.1           |
| Smoking*                                           | 15            | 16.9          | 20.9          | 22.6          | 25.3          | 28.8        | 29.5          | 31.9          | 33.2          |
| Obstructive sleep apnea*                           | 2.7           | 3.3           | 4.1           | 5.4           | 6.1           | 7.4         | 8.2           | 9.8           | 10.3          |
| Hospital Characteristics (%)                       |               |               |               |               |               |             |               |               |               |
| Teaching status                                    |               |               |               |               |               |             |               |               |               |
| Teaching                                           | 41.6          | 41.1          | 39            | 39.6          | 37.6          | 34.3        | 45.1          | 40.9          | 42.2          |
| Hospital size                                      |               |               |               |               |               |             |               |               |               |
| Small                                              | 12.5          | 13.1          | 12.9          | 12.8          | 13.4          | 14.2        | 16.8          | 13.8          | 14.2          |
| Medium                                             | 31.9          | 28.3          | 27.9          | 29.1          | 27.3          | 26.1        | 26.5          | 28.1          | 26.1          |
| Large                                              | 55.6          | 58.6          | 59.2          | 58            | 59.4          | 59.7        | 56.7          | 58.1          | 59.7          |
| Hospital ownership                                 |               |               |               |               |               |             |               |               |               |
| Government-Non federal                             | 14.7          | 13.8          | 16.2          | 15.7          | 14.5          | 15.1        | 14.1          | 13.5          | 13.5          |
| Private - non profit                               | 73.3          | 73            | 70.7          | 70.5          | 72            | 70.5        | 72.6          | 71.3          | 72.3          |
| Private - investor owned                           | 12.0          | 13.2          | 13.1          | 13.8          | 13.5          | 14.4        | 13.3          | 15.3          | 14.2          |
| Mechanical Ventilation, N                          |               |               |               |               |               |             |               |               |               |
| Total NIV*                                         | 796           | 899           | 1336          | 2177          | 2849          | 2534        | 4336          | 4448          | 4908          |
| NIV in patients without OSA*                       | 486           | 575           | 819           | 1239          | 1685          | 1315        | 2682          | 2532          | 2987          |
| Started on NIV but went on to invasive ventilation | 37            | 30            | 72            | 95            | 80            | 59          | 134           | 95            | 133           |
| Total invasive MV*                                 | 3095          | 3132          | 3081          | 3408          | 2530          | 2045        | 1870          | 1820          | 1931          |
| Any mechanical ventilation (invasive + NIV)        | 3891          | 4031          | 4417          | 5585          | 5379          | 4579        | 6206          | 6268          | 6839          |

Appendix 7: Characteristics of patients requiring NIV for AAE (2000-2008)

| Patient characteristics                | Non invasive mechanical ventilation in first 2 days |           |           |           |           |           |           |           |           |
|----------------------------------------|-----------------------------------------------------|-----------|-----------|-----------|-----------|-----------|-----------|-----------|-----------|
|                                        | 2000                                                | 2001      | 2002      | 2003      | 2004      | 2005      | 2006      | 2007      | 2008      |
| Total                                  | 796                                                 | 899       | 1336      | 2177      | 2849      | 2534      | 4336      | 4448      | 4908      |
| Age in years, mean ± SD                | 50.2±14.7                                           | 51.5±15.5 | 51.6±15.2 | 53.4±15.4 | 53.3±16.0 | 53.9±15.6 | 54.7±16.2 | 53.7±15.2 | 54.6±15.8 |
| Sex (%)                                |                                                     |           |           |           |           |           |           |           |           |
| Female                                 | 73                                                  | 65.8      | 65.1      | 66        | 66.5      | 64.1      | 64.5      | 66.4      | 65.9      |
| Race(%)                                |                                                     |           |           |           |           |           |           |           |           |
| White                                  | 42.3                                                | 44.7      | 41.4      | 39.6      | 42        | 49.5      | 40.3      | 46        | 45.7      |
| African American                       | 36.7                                                | 29.3      | 27.1      | 29        | 30.3      | 22.9      | 33.9      | 32.8      | 30.3      |
| Hispanic                               | 8.0                                                 | 8.6       | 10.5      | 19        | 14.8      | 10.7      | 10.2      | 8.9       | 11.1      |
| Asian                                  | -                                                   | 3.5       | 0.8       | 4.0       | 3.9       | 1.9       | 4.7       | 1.5       | 1.6       |
| Others                                 | 7.9                                                 | 1.9       | 6.4       | 3.5       | 1.0       | 4.2       | 3.0       | 3.0       | 2.9       |
| Unknown                                | 5.0                                                 | 11.9      | 13.8      | 4.8       | 8.0       | 10.5      | 7.9       | 7.8       | 8.5       |
| Payer (%)                              |                                                     |           |           |           |           |           |           |           |           |
| Medicare                               | 33.3                                                | 36.2      | 33.2      | 40.4      | 36.5      | 45.8      | 42.8      | 38.8      | 43.8      |
| Medicaid                               | 28.8                                                | 27.3      | 25.9      | 26.3      | 27.1      | 22.9      | 25.5      | 22.5      | 21.6      |
| Private                                | 30.4                                                | 26.1      | 33.3      | 24.7      | 27.1      | 21.9      | 20.5      | 26.2      | 24.2      |
| Self                                   | 6.4                                                 | 6.4       | 5.5       | 4.7       | 5.7       | 6.2       | 7.6       | 8.3       | 6.3       |
| Other                                  | 1.2                                                 | 4.0       | 2.1       | 3.9       | 3.5       | 3.2       | 3.6       | 4.2       | 4.2       |
| Charlson-Deyo's co-morbidity index (%) |                                                     |           |           |           |           |           |           |           |           |
| 1-2                                    | 94.9                                                | 91.9      | 91.3      | 90.7      | 89.2      | 89.8      | 87.1      | 86.6      | 82.5      |
| 3-4                                    | 3.2                                                 | 6.4       | 7.9       | 7.6       | 9.0       | 8.2       | 10.4      | 9.9       | 14.5      |
| 5-6                                    | -                                                   | -         | -         | -         | -         | 0.6       | 0.9       | 2.3       | 2.3       |
| 7 or more                              | 1.8                                                 | 1.7       | -         | 1.2       | 1.4       | 1.4       | 1.6       | 1.2       | 0.8       |
| Co-morbidities (%)                     |                                                     |           |           |           |           |           |           |           |           |
| Diabetes mellitus                      | 27.4                                                | 32.6      | 29.4      | 35.8      | 32.6      | 38.1      | 37        | 36.4      | 34.9      |
| Congestive heart failure               | 19.7                                                | 16.8      | 19.3      | 17.7      | 22.9      | 24        | 23.3      | 22        | 22.4      |
| Morbid obesity                         | 17.5                                                | 21.9      | 16.4      | 20.6      | 16.5      | 22.4      | 21.6      | 23.4      | 24.9      |
| Cancer                                 | 2.5                                                 | 2.3       | 4.4       | 3.5       | 4.2       | 4.1       | 4.6       | 3.6       | 5.2       |
| Alcoholism                             | -                                                   | -         | 2.3       | 4.1       | 1.2       | 1.9       | 2.6       | 2.5       | 2.5       |
| Smoking                                | 20.4                                                | 14.2      | 30.2      | 25.7      | 25.2      | 29.1      | 35.1      | 37        | 36.8      |
| Hospital Characteristics (%)           |                                                     |           |           |           |           |           |           |           |           |
| Teaching status                        |                                                     |           |           |           |           |           |           |           |           |
| Teaching hospital                      | 56.8                                                | 58.6      | 51.2      | 61.7      | 56.3      | 48.9      | 57.8      | 52.2      | 56.6      |
| Hospital size                          |                                                     |           |           |           |           |           |           |           |           |
| Small                                  | 10.1                                                | 12.7      | 8.5       | 11.8      | 7.5       | 13.5      | 13        | 8.8       | 14.3      |
| Medium                                 | 26.0                                                | 17.7      | 34.3      | 30.4      | 25.1      | 29.1      | 29        | 33.6      | 23.0      |
| Large                                  | 63.9                                                | 69.6      | 57.2      | 57.8      | 67.4      | 57.4      | 58        | 57.6      | 62.7      |
| Hospital ownership                     |                                                     |           |           |           |           |           |           |           |           |
| Government-Non federal                 | 12.6                                                | 12.5      | 14.4      | 12.8      | 8.2       | 15.8      | 13.5      | 13.8      | 14.6      |
| Private - non profit                   | 78.9                                                | 77.6      | 76.7      | 80.8      | 84        | 73.4      | 75.3      | 78.2      | 75.5      |
| Private - investor owned               | 8.4                                                 | 9.9       | 8.9       | 6.3       | 7.8       | 10.8      | 11.2      | 7.9       | 9.8       |

Appendix 8: Characteristics of patients requiring invasive mechanical ventilation for AAE (2000-2008)

| Patient characteristics                | Invasive mechanical ventilation in first 2 days |           |           |           |           |           |           |           |           |
|----------------------------------------|-------------------------------------------------|-----------|-----------|-----------|-----------|-----------|-----------|-----------|-----------|
|                                        | 2000                                            | 2001      | 2002      | 2003      | 2004      | 2005      | 2006      | 2007      | 2008      |
| Total                                  | 3095                                            | 3132      | 3081      | 3408      | 2530      | 2045      | 1870      | 1820      | 1931      |
| Age in years, mean ± SD                | 47.5±17.3                                       | 48.4±17.7 | 48.8±17.5 | 48.9±17.3 | 50.7±17.4 | 49.0±16.8 | 50.2±17.1 | 49.6±18.0 | 48.1±17.2 |
| Sex (%)                                |                                                 |           |           |           |           |           |           |           |           |
| Female                                 | 64.4                                            | 62        | 65        | 63.3      | 63.7      | 63.4      | 63.2      | 66.2      | 67.5      |
| Race(%)                                |                                                 |           |           |           |           |           |           |           |           |
| White                                  | 38.5                                            | 41.6      | 31.7      | 33.4      | 36.5      | 43.9      | 35.3      | 41        | 44.9      |
| African American                       | 26.6                                            | 24.8      | 35.7      | 30.5      | 34.5      | 25.1      | 34.8      | 29.3      | 29.3      |
| Hispanic                               | 14.5                                            | 11.9      | 8.0       | 12.7      | 12.4      | 8.5       | 11.8      | 10.7      | 9.0       |
| Asian                                  | 5.7                                             | 4.8       | 4.9       | 4.1       | 2.6       | 2.5       | 4.2       | 3.9       | 2.5*      |
| Others                                 | 4.4                                             | 2.6       | 4.4       | 6.9       | 2.6       | 6.2       | 1.5       | 3.1       | 5.9       |
| Unknown                                | 10.3                                            | 14.3      | 15.1      | 12.4      | 11.4      | 13.7      | 11.4      | 11.8      | 8.4       |
| Payer (%)                              |                                                 |           |           |           |           |           |           |           |           |
| Medicare                               | 21.7                                            | 24.3      | 28.3      | 26.9      | 30.7      | 27        | 30.9      | 28.3      | 27.3      |
| Medicaid                               | 26.6                                            | 24.5      | 22.5      | 25.8      | 25        | 26.3      | 25.4      | 22.2      | 23        |
| Private                                | 36.3                                            | 35.4      | 28.6      | 30.5      | 28.8      | 25.2      | 26.2      | 27.6      | 28.3*     |
| Self                                   | 10.8                                            | 11.5      | 16.7      | 11.8      | 12.6      | 15.1      | 12.1      | 17        | 14.2      |
| Other                                  | 4.6                                             | 4.3       | 3.8       | 5.0       | 2.9       | 6.4       | 5.5       | 4.8       | 7.2       |
| Charlson-Deyo's co-morbidity index (%) |                                                 |           |           |           |           |           |           |           |           |
| 1-2                                    | 95.4                                            | 95.5      | 95.3      | 94.1      | 91.3      | 88.4      | 90        | 87.9      | 85.9*     |
| 3-4                                    | 3.8                                             | 3.2       | 4.0       | 4.6       | 6.9       | 7.9       | 7.0       | 8.5       | 10.7*     |
| 5-6                                    | -                                               | -         | -         | -         | -         | 0.8       | -         | 1.7       | 2.5*      |
| 7 or more                              | 0.7                                             | 1.2       | 0.7       | 1.1       | 1.4       | 2.9       | 2.8       | 1.9       | 0.8       |
| Co-morbidities (%)                     |                                                 |           |           |           |           |           |           |           |           |
| Diabetes mellitus                      | 12.3                                            | 15.3      | 14.9      | 18.7      | 21.2      | 20.5      | 22.3      | 17.4      | 23.8*     |
| Congestive heart failure               | 7.9                                             | 7.3       | 10.8      | 11.8      | 13.2      | 13.5      | 15.6      | 15.6      | 13.5*     |
| Morbid obesity                         | 2.5                                             | 2.4       | 3.6       | 3.4       | 4.2       | 5.6       | 5.2       | 8.3       | 8.9*      |
| Cancer                                 | 2.3                                             | 3.3       | 2.5       | 2.9       | 4.2       | 2.8       | 4.0       | 3.1       | 4.1       |
| Alcoholism                             | 2.5                                             | 3.5       | 3.6       | 3.4       | 4.1       | 3.4       | 5.5       | 4.7       | 5.7*      |
| Smoking                                | 12.4                                            | 17.5      | 17.1      | 20.3      | 23.9      | 30.2      | 24.7      | 29.4      | 34.7*     |
| Hospital Characteristics (%)           |                                                 |           |           |           |           |           |           |           |           |
| Teaching status                        |                                                 |           |           |           |           |           |           |           |           |
| Teaching hospital                      | 56.7                                            | 53.9      | 53        | 57.4      | 54.4      | 54.1      | 64.2      | 58        | 55.3      |
| Hospital size                          |                                                 |           |           |           |           |           |           |           |           |
| Small                                  | 12.9                                            | 11.9      | 9.5       | 9.7       | 10.4      | 11.2      | 13.6      | 9.7       | 7.6*      |
| Medium                                 | 34.5                                            | 31        | 32.6      | 29        | 25.2      | 24.3      | 25.3      | 30.1      | 30.5      |
| Large                                  | 52.5                                            | 57.1      | 58        | 61.2      | 64.4      | 64.6      | 61.1      | 60.2      | 61.9*     |
| Hospital ownership                     |                                                 |           |           |           |           |           |           |           |           |
| Government-Non federal                 | 19.1                                            | 16.2      | 21.2      | 24.3      | 17.5      | 26        | 21.5      | 19.1      | 18.1      |
| Private - non profit                   | 69.8                                            | 73.1      | 66        | 66.4      | 70.3      | 66.5      | 69        | 73.1      | 69.3      |
| Private - investor owned               | 11.1                                            | 10.7      | 12.8      | 9.3       | 12.2      | 7.5       | 9.5       | 7.9       | 12.6      |

Appendix 9: Outcomes of patients with acute asthma exacerbation –2000 to2008.

|                                                               | 2000   |        |             | 2001  |     |             | 2002   |        |             |
|---------------------------------------------------------------|--------|--------|-------------|-------|-----|-------------|--------|--------|-------------|
|                                                               | No MV  | NIV    | invasive MV | No MV | NIV | IMV         | No MV  | NIV    | Invasive MV |
| All cause in-hospital mortality, (%)                          | 0.2    | 1.2    | 6.4         | 0.3   | 1.5 | 6.8         | 0.3    | 1.1    | 5.1         |
| 3 day mortality, (%)                                          | 0.08   | -      | 2.3         | 0.10  | -   | 3.4         | 0.07   | -      | 2.1         |
| Prolonged mechanical ventilation (>96hrs)                     | -      | -      | 23.1        | -     | -   | 19.1        | -      | -      | 18.1        |
| Tracheostomy (%)                                              | -      | -      | 0.8         | -     | -   | 1.3         | -      | -      | 1.3         |
| Pneumothorax (%)                                              | -      | -      | 0.9         | -     | -   | 1.8         | -      | -      | 2.1         |
| Disposition in survivors, (%)                                 |        |        |             |       |     |             |        |        |             |
| Home                                                          | 89.3   | 76.9   | 75.6        | 88    | 73  | 79          | 88     | 84     | 80          |
| Inter hospital transfer                                       | 0.7    | -      | 5.6         | 0.7   | -   | 3.3         | 0.7    | -      | 3.3         |
| Skilled nursing facility^                                     | 3.5    | 5.1    | 7.0         | 4.2   | 5.1 | 7.5         | 4.3    | 5.2    | 7.5         |
| Home with home care                                           | 4.3    | 15.5   | 7.0         | 4.7   | 15  | 5.7         | 4.7    | 9      | 5.2         |
| AMA/unknown                                                   | 2.3    | 1.9    | 5.1         | 2.3   | 1.9 | 4.2         | 2.3    | 1.5    | 3.6         |
| Median LOS in days, Inter quartile range.                     | 3(2-5) | 4(2-7) | 5(3-8)      |       |     |             |        |        |             |
|                                                               | 2003   |        |             | 2004  |     |             | 2005   |        |             |
|                                                               | No MV  | NIV    | Invasive MV | No MV | NIV | Invasive MV | No MV  | NIV    | Invasive MV |
| All cause in-hospital mortality, (%)                          | 0.3    | 1.8    | 5.7         | 0.3   | 0.7 | 6.7         | 0.2    | 1.7    | 5.7         |
| 3 day mortality, (%)                                          | 0.09   | 0.7    | 2.8         | 0.09  | -   | 4           | 0.05   | 0.6    | 3.6         |
| Prolonged mechanical ventilation (>96hrs)                     | -      | -      | 21.8        | -     | -   | 19.7        | -      | -      | 21.8        |
| Tracheostomy (%)                                              | -      | -      | 1.4         | -     | -   | 1.3         | -      | -      | 1.2         |
| Pneumothorax (%)                                              | -      | -      | 1.6         | -     | -   | 1.3         | -      | -      | 0.9         |
| Disposition in survivors, (%)                                 |        |        |             |       |     |             |        |        |             |
| Home                                                          | 88     | 79     | 78          | 85    | 75  | 72          | 85     | 74     | 72          |
| Inter hospital transfer                                       | 0.6    | 1.1    | 5.3         | 0.7   | -   | 3.9         | 0.7    | 1.1    | 3.1         |
| Skilled nursing facility^                                     | 4.2    | 6.6    | 6.9         | 5.2   | 8.6 | 12          | 5.4    | 9.3    | 11          |
| Home with home care                                           | 5.1    | 12     | 5.9         | 7     | 14  | 8.7         | 7      | 15     | 9.9         |
| AMA/unknown                                                   | 2.3    | 2      | 4           | 2.2   | 2.5 | 3.2         | 2      | 1      | 3.9         |
| Median length of hospital stay in days, Inter quartile range. |        |        |             |       |     |             |        |        |             |
|                                                               | 2006   |        |             | 2007  |     |             | 2008   |        |             |
|                                                               | No MV  | NIV    | Invasive MV | No MV | NIV | Invasive MV | No MV  | NIV    | Invasive MV |
| All cause in-hospital mortality, (%)                          | 0.2    | 1      | 5.4         | 0.2   | 0.4 | 8.7         | 0.2    | 0.8    | 6.9         |
| 3 day mortality, (%)                                          | 0.08   | 0.4    | 3.7         | 0.06  | 0.3 | 5.5         | 0.05*  | 0.6    | 4.5         |
| Prolonged mechanical ventilation (>96hrs)                     | -      | -      | 21.3        | -     | -   | 17          | -      | -      | 18.2        |
| Tracheostomy (%)                                              | -      | -      | 0.7         | -     | -   | 0.4         | -      | -      | 1.5         |
| Pneumothorax (%)                                              | -      | -      | 0.7         | -     | -   | 0.8         | -      | -      | 1.2         |
| Disposition in survivors, (%)                                 |        |        |             |       |     |             |        |        |             |
| Home                                                          | 84     | 72     | 71          | 85    | 75  | 69          | 84.5*  | 76.2   | 70.9        |
| Inter hospital transfer                                       | 0.6    | 1      | 3.3         | 0.7   | 1.0 | 4.5         | 0.7    | 1.0    | 4.6         |
| Skilled nursing facility^                                     | 5      | 9.3    | 10          | 5.1   | 9.6 | 12          | 4.7*   | 6.3    | 9.0         |
| Home with home care                                           | 7.5    | 15     | 10          | 7     | 12  | 9.3         | 7.7*   | 13.2   | 11.8*       |
| AMA/unknown                                                   | 2.4    | 2.4    | 5.3         | 2.5   | 2.7 | 4.8         | 2.4    | 3.4    | 3.6         |
| Median length of hospital stay in days, Inter quartile range. |        |        |             |       |     |             | 3(2-5) | 4(2-6) | 5(3-8)      |

\* Significant difference between 2000 and 2008 at p<0.05



^ Also includes intermediate care

Appendix 10: Trend lines, represented by dashed lines, are added to figure 2. We also provide the slope from a simple regression equation.

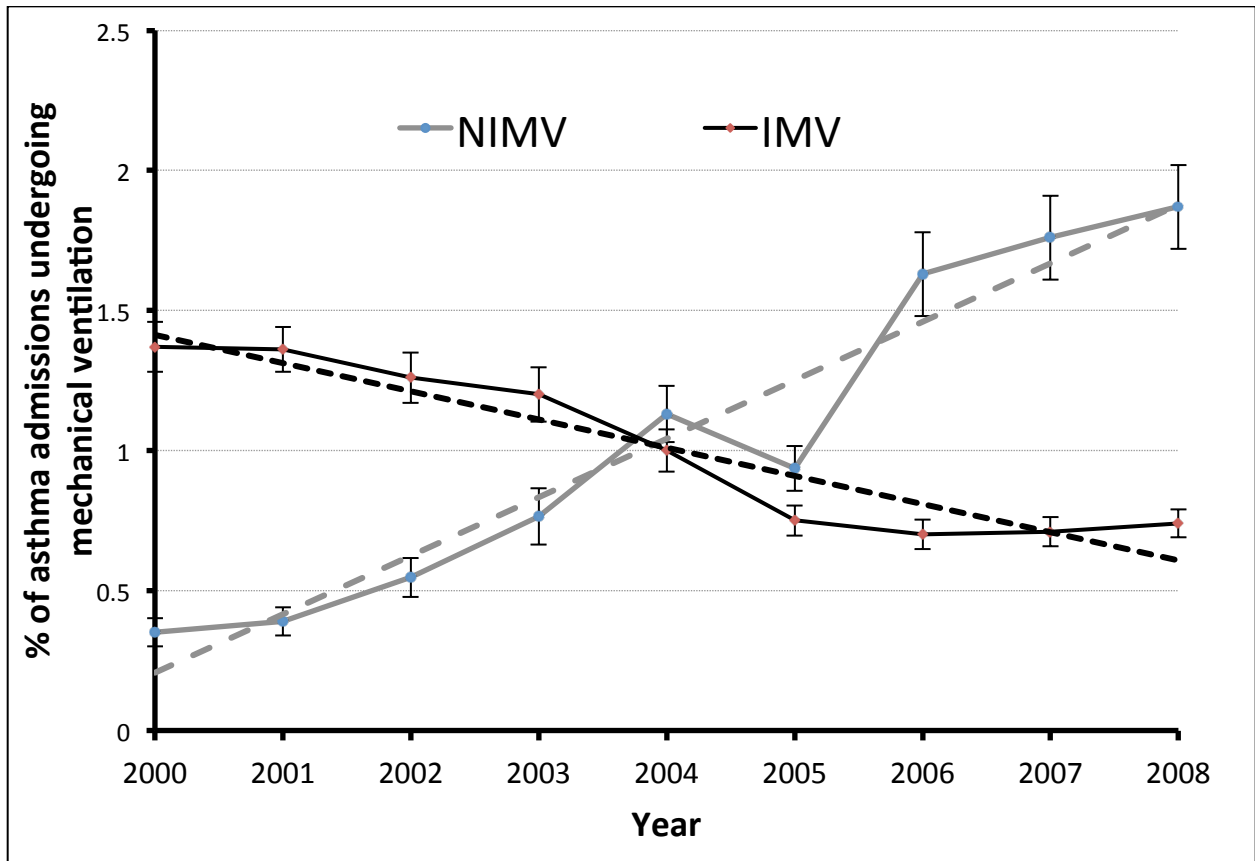

Slope of IMV: -0.10  
Slope for NIMV: +0.21
